# Supplementary material for: A combination of tyrosine kinase inhibitors, crizotinib and dasatinib for the treatment of glioblastoma multiforme
Source: PubMed Central journal article supplement (PMC4741976; doi:10.18632/oncotarget.5698), 2015-10-16
Supplement: oncotarget-06-37948-s001.pdf [file oncotarget-06-37948-s001.pdf]

## SUPPLEMENTARY TABLES

Supplementary Table S1: Statistical analysis of U87 cell cycle

|                      |                      |            |                      |            |                      |                 |                      |                 |                      |                 |  |
|----------------------|----------------------|------------|----------------------|------------|----------------------|-----------------|----------------------|-----------------|----------------------|-----------------|--|
| 1<br>X               | 48 hours             |            | 72 hours             |            | 24 hour washout      |                 | 48 hour washout      |                 | 72 hour washout      |                 |  |
|                      | Treatment            | $P (\leq)$ | Treatment            | $P (\leq)$ | Treatment            | $P (\leq)$      | Treatment            | $P (\leq)$      | Treatment            | $P (\leq)$      |  |
|                      | Control V Dasatinib  | NS         | Control V Dasatinib  | NS         | Control V Dasatinib  | NS              | Control V Dasatinib  | NS              | Control V Dasatinib  | NS              |  |
|                      | Control V Crizotinib | 0.001      | Control V Crizotinib | 0.001      | Control V Crizotinib | 0.001           | Control V Crizotinib | 0.001           | Control V Crizotinib | 0.001           |  |
|                      | Control V Combo      | 0.001      | Control V Combo      | 0.001      | Control V Combo      | 0.001           | Control V Combo      | 0.01            | Control V Combo      | 0.001           |  |
|                      | Source of variation  |            |                      |            |                      | $P$ value       |                      |                 |                      |                 |  |
|                      | Drug                 |            |                      |            |                      | $\leq 0.0001$   |                      |                 |                      |                 |  |
|                      | Time                 |            |                      |            |                      | $\leq 0.0001$   |                      |                 |                      |                 |  |
|                      | Interaction          |            |                      |            |                      | $\leq 0.0001$   |                      |                 |                      |                 |  |
|                      | S                    | 48 hours   |                      | 72 hours   |                      | 24 hour washout |                      | 48 hour washout |                      | 72 hour washout |  |
| Treatment            |                      | $P (\leq)$ | Treatment            | $P (\leq)$ | Treatment            | $P (\leq)$      | Treatment            | $P (\leq)$      | Treatment            | $P (\leq)$      |  |
| Control V Dasatinib  |                      | NS         | Control V Dasatinib  | NS         | Control V Dasatinib  | NS              | Control V Dasatinib  | NS              | Control V Dasatinib  | NS              |  |
| Control V Crizotinib |                      | 0.001      | Control V Crizotinib | 0.01       | Control V Crizotinib | NS              | Control V Crizotinib | 0.001           | Control V Crizotinib | NS              |  |
| Control V Combo      |                      | 0.01       | Control V Combo      | 0.05       | Control V Combo      | NS              | Control V Combo      | 0.01            | Control V Combo      | NS              |  |
| Source of variation  |                      |            |                      |            | $P$ value            |                 |                      |                 |                      |                 |  |
| Drug                 |                      |            |                      |            | $\leq 0.0001$        |                 |                      |                 |                      |                 |  |
| Time                 |                      |            |                      |            | $\leq 0.0001$        |                 |                      |                 |                      |                 |  |
| Interaction          |                      |            |                      |            | NS (0.23)            |                 |                      |                 |                      |                 |  |
| 2<br>X               |                      | 48 hours   |                      | 72 hours   |                      | 24 hour washout |                      | 48 hour washout |                      | 72 hour washout |  |
|                      | Treatment            | $P (\leq)$ | Treatment            | $P (\leq)$ | Treatment            | $P (\leq)$      | Treatment            | $P (\leq)$      | Treatment            | $P (\leq)$      |  |
|                      | Control V Dasatinib  | NS         | Control V Dasatinib  | NS         | Control V Dasatinib  | NS              | Control V Dasatinib  | NS              | Control V Dasatinib  | NS              |  |
|                      | Control V Crizotinib | 0.001      | Control V Crizotinib | 0.001      | Control V Crizotinib | NS              | Control V Crizotinib | NS              | Control V Crizotinib | 0.05            |  |
|                      | Control V Combo      | 0.001      | Control V Combo      | 0.001      | Control V Combo      | NS              | Control V Combo      | NS              | Control V Combo      | NS              |  |
|                      | Source of variation  |            |                      |            |                      | $P$ value       |                      |                 |                      |                 |  |
|                      | Drug                 |            |                      |            |                      | NS (0.057)      |                      |                 |                      |                 |  |
|                      | Time                 |            |                      |            |                      | $\leq 0.001$    |                      |                 |                      |                 |  |
|                      | Interaction          |            |                      |            |                      | $\leq 0.0001$   |                      |                 |                      |                 |  |

(Continued)

|     |                      |            |                      |            |                      |               |                      |            |                      |            |  |
|-----|----------------------|------------|----------------------|------------|----------------------|---------------|----------------------|------------|----------------------|------------|--|
| T   | 48 hours             |            | 72 hours             |            | 24 hour washout      |               | 48 hour washout      |            | 72 hour washout      |            |  |
|     | Treatment            | $P (\leq)$ | Treatment            | $P (\leq)$ | Treatment            | $P (\leq)$    | Treatment            | $P (\leq)$ | Treatment            | $P (\leq)$ |  |
|     | Control V Dasatinib  | NS         | Control V Dasatinib  | NS         | Control V Dasatinib  | NS            | Control V Dasatinib  | NS         | Control V Dasatinib  | NS         |  |
|     | Control V Crizotinib | NS         | Control V Crizotinib | NS         | Control V Crizotinib | NS            | Control V Crizotinib | 0.01       | Control V Crizotinib | NS         |  |
|     | Control V Combo      | NS         | Control V Combo      | NS         | Control V Combo      | NS            | Control V Combo      | 0.01       | Control V Combo      | 0.01       |  |
|     | Source of variation  |            |                      |            |                      | $P$ value     |                      |            |                      |            |  |
|     | Drug                 |            |                      |            |                      | $\leq 0.0001$ |                      |            |                      |            |  |
|     | Time                 |            |                      |            |                      | $\leq 0.0001$ |                      |            |                      |            |  |
|     | Interaction          |            |                      |            |                      | $\leq 0.0001$ |                      |            |                      |            |  |
| 4 X | 48 hours             |            | 72 hours             |            | 24 hour washout      |               | 48 hour washout      |            | 72 hour washout      |            |  |
|     | Treatment            | $P (\leq)$ | Treatment            | $P (\leq)$ | Treatment            | $P (\leq)$    | Treatment            | $P (\leq)$ | Treatment            | $P (\leq)$ |  |
|     | Control V Dasatinib  | NS         | Control V Dasatinib  | NS         | Control V Dasatinib  | NS            | Control V Dasatinib  | NS         | Control V Dasatinib  | NS         |  |
|     | Control V Crizotinib | 0.001      | Control V Crizotinib | 0.001      | Control V Crizotinib | 0.001         | Control V Crizotinib | 0.001      | Control V Crizotinib | 0.001      |  |
|     | Control V Combo      | 0.05       | Control V Combo      | 0.001      | Control V Combo      | 0.01          | Control V Combo      | 0.001      | Control V Combo      | 0.001      |  |
|     | Source of variation  |            |                      |            |                      | $P$ value     |                      |            |                      |            |  |
|     | Drug                 |            |                      |            |                      | $\leq 0.0001$ |                      |            |                      |            |  |
|     | Time                 |            |                      |            |                      | $\leq 0.0001$ |                      |            |                      |            |  |
|     | Interaction          |            |                      |            |                      | $\leq 0.0001$ |                      |            |                      |            |  |
| T   | 48 hours             |            | 72 hours             |            | 24 hour washout      |               | 48 hour washout      |            | 72 hour washout      |            |  |
|     | Treatment            | $P (\leq)$ | Treatment            | $P (\leq)$ | Treatment            | $P (\leq)$    | Treatment            | $P (\leq)$ | Treatment            | $P (\leq)$ |  |
|     | Control V Dasatinib  | NS         | Control V Dasatinib  | NS         | Control V Dasatinib  | NS            | Control V Dasatinib  | NS         | Control V Dasatinib  | NS         |  |
|     | Control V Crizotinib | NS         | Control V Crizotinib | 0.05       | Control V Crizotinib | 0.001         | Control V Crizotinib | 0.01       | Control V Crizotinib | 0.001      |  |
|     | Control V Combo      | NS         | Control V Combo      | NS         | Control V Combo      | 0.001         | Control V Combo      | NS         | Control V Combo      | NS         |  |
|     | Source of variation  |            |                      |            |                      | $P$ value     |                      |            |                      |            |  |
|     | Drug                 |            |                      |            |                      | $\leq 0.0001$ |                      |            |                      |            |  |
|     | Time                 |            |                      |            |                      | $\leq 0.0001$ |                      |            |                      |            |  |
|     | Interaction          |            |                      |            |                      | $\leq 0.05$   |                      |            |                      |            |  |

(Continued)

| 8<br>X | 48 hours             |              | 72 hours             |              | 24 hour washout       |              | 48 hour washout      |              | 72 hour washout      |              |  |
|--------|----------------------|--------------|----------------------|--------------|-----------------------|--------------|----------------------|--------------|----------------------|--------------|--|
|        | Treatment            | <i>P</i> (≤) | Treatment            | <i>P</i> (≤) | Treatment             | <i>P</i> (≤) | Treatment            | <i>P</i> (≤) | Treatment            | <i>P</i> (≤) |  |
|        | Control V Dasatinib  | NS           | Control V Dasatinib  | NS           | Control V Dasatinib   | NS           | Control V Dasatinib  | NS           | Control V Dasatinib  | NS           |  |
|        | Control V Crizotinib | NS           | Control V Crizotinib | NS0          | Control V Crizotinib  | 0.001        | Control V Crizotinib | 0.001        | Control V Crizotinib | 0.001        |  |
|        | Control V Combo      | NS           | Control V Combo      | NS           | Control V Combination | 0.001        | Control V Combo      | 0.001        | Control V Combo      | 0.001        |  |
|        | Source of variation  |              |                      |              |                       |              | <i>P</i> value       |              |                      |              |  |
|        | Drug                 |              |                      |              |                       |              | ≤ 0.0001             |              |                      |              |  |
|        | Time                 |              |                      |              |                       |              | ≤ 0.0001             |              |                      |              |  |
|        | Interaction          |              |                      |              |                       |              | ≤ 0.0001             |              |                      |              |  |

X denotes the quantity of DNA in the G1 phase of the cell cycle. 2X corresponds to the G2M phase while 4X and 8X to tetraploid and octoploid cells. S denotes DNA synthesis phase and T denotes transitional phase between the diploid, tetraploid and octoploid phases. Combo denotes combination and NS non-significant.

**Supplementary Table S2: Statistical analysis of LN-18 cell cycle**

| 1<br>X | 48 hours             |              | 72 hours             |              | 24 hour washout      |              | 48 hour washout      |              | 72 hour washout      |              |  |
|--------|----------------------|--------------|----------------------|--------------|----------------------|--------------|----------------------|--------------|----------------------|--------------|--|
|        | Treatment            | <i>P</i> (≤) | Treatment            | <i>P</i> (≤) | Treatment            | <i>P</i> (≤) | Treatment            | <i>P</i> (≤) | Treatment            | <i>P</i> (≤) |  |
|        | Control V Dasatinib  | NS           | Control V Dasatinib  | NS           | Control V Dasatinib  | NS           | Control V Dasatinib  | NS           | Control V Dasatinib  | NS           |  |
|        | Control V Crizotinib | 0.001        | Control V Crizotinib | 0.001        | Control V Crizotinib | 0.001        | Control V Crizotinib | 0.001        | Control V Crizotinib | 0.001        |  |
|        | Control V Combo      | 0.001        | Control V Combo      | 0.001        | Control V Combo      | 0.001        | Control V Combo      | 0.001        | Control V Combo      | 0.001        |  |
|        | Source of variation  |              |                      |              |                      |              | <i>P</i> value       |              |                      |              |  |
|        | Drug                 |              |                      |              |                      |              | ≤0.0001              |              |                      |              |  |
|        | Time                 |              |                      |              |                      |              | ≤0.0001              |              |                      |              |  |
|        | Interaction          |              |                      |              |                      |              | NS (0.082)           |              |                      |              |  |

  

| S | 48 hours             |              | 72 hours             |              | 24 hour washout      |              | 48 hour washout      |              | 72 hour washout      |              |  |
|---|----------------------|--------------|----------------------|--------------|----------------------|--------------|----------------------|--------------|----------------------|--------------|--|
|   | Treatment            | <i>P</i> (≤) | Treatment            | <i>P</i> (≤) | Treatment            | <i>P</i> (≤) | Treatment            | <i>P</i> (≤) | Treatment            | <i>P</i> (≤) |  |
|   | Control V Dasatinib  | NS           | Control V Dasatinib  | NS           | Control V Dasatinib  | NS           | Control V Dasatinib  | NS           | Control V Dasatinib  | NS           |  |
|   | Control V Crizotinib | 0.01         | Control V Crizotinib | NS           | Control V Crizotinib | NS           | Control V Crizotinib | 0.05         | Control V Crizotinib | NS           |  |
|   | Control V Combo      | NS           | Control V Combo      | NS           | Control V Combo      | NS           | Control V Combo      | NS           | Control V Combo      | NS           |  |
|   | Source of variation  |              |                      |              |                      |              | <i>P</i> value       |              |                      |              |  |
|   | Drug                 |              |                      |              |                      |              | ≤0.0001              |              |                      |              |  |
|   | Time                 |              |                      |              |                      |              | NS (0.053)           |              |                      |              |  |
|   | Interaction          |              |                      |              |                      |              | ≤0.0001              |              |                      |              |  |

(Continued)

|                      |                      |            |                      |            |                      |                 |                      |                 |                      |                 |
|----------------------|----------------------|------------|----------------------|------------|----------------------|-----------------|----------------------|-----------------|----------------------|-----------------|
| 2<br>X               | 48 hours             |            | 72 hours             |            | 24 hour washout      |                 | 48 hour washout      |                 | 72 hour washout      |                 |
|                      | Treatment            | $P (\leq)$ | Treatment            | $P (\leq)$ | Treatment            | $P (\leq)$      | Treatment            | $P (\leq)$      | Treatment            | $P (\leq)$      |
|                      | Control V Dasatinib  | NS         | Control V Dasatinib  | NS         | Control V Dasatinib  | NS              | Control V Dasatinib  | NS              | Control V Dasatinib  | NS              |
|                      | Control V Crizotinib | 0.001      | Control V Crizotinib | 0.01       | Control V Crizotinib | NS              | Control V Crizotinib | NS              | Control V Crizotinib | NS              |
|                      | Control V Combo      | 0.001      | Control V Combo      | 0.01       | Control V Combo      | NS              | Control V Combo      | NS              | Control V Combo      | NS              |
|                      | Source of variation  |            |                      |            |                      | $P$ value       |                      |                 |                      |                 |
|                      | Drug                 |            |                      |            |                      | $\leq 0.0001$   |                      |                 |                      |                 |
|                      | Time                 |            |                      |            |                      | $\leq 0.0001$   |                      |                 |                      |                 |
|                      | Interaction          |            |                      |            |                      | $\leq 0.0001$   |                      |                 |                      |                 |
|                      | T                    | 48 hours   |                      | 72 hours   |                      | 24 hour washout |                      | 48 hour washout |                      | 72 hour washout |
| Treatment            |                      | $P (\leq)$ | Treatment            | $P (\leq)$ | Treatment            | $P (\leq)$      | Treatment            | $P (\leq)$      | Treatment            | $P (\leq)$      |
| Control V Dasatinib  |                      | NS         | Control V Dasatinib  | NS         | Control V Dasatinib  | NS              | Control V Dasatinib  | NS              | Control V Dasatinib  | NS              |
| Control V Crizotinib |                      | NS         | Control V Crizotinib | NS         | Control V Crizotinib | NS              | Control V Crizotinib | NS              | Control V Crizotinib | NS              |
| Control V Combo      |                      | NS         | Control V Combo      | NS         | Control V Combo      | NS              | Control V Combo      | 0.05            | Control V Combo      | 0.05            |
| Source of variation  |                      |            |                      |            | $P$ value            |                 |                      |                 |                      |                 |
| Drug                 |                      |            |                      |            | $\leq 0.0001$        |                 |                      |                 |                      |                 |
| Time                 |                      |            |                      |            | $\leq 0.0001$        |                 |                      |                 |                      |                 |
| Interaction          |                      |            |                      |            | NS (0.097)           |                 |                      |                 |                      |                 |
| 4<br>X               |                      | 48 hours   |                      | 72 hours   |                      | 24 hour washout |                      | 48 hour washout |                      | 72 hour washout |
|                      | Treatment            | $P (\leq)$ | Treatment            | $P (\leq)$ | Treatment            | $P (\leq)$      | Treatment            | $P (\leq)$      | Treatment            | $P (\leq)$      |
|                      | Control V Dasatinib  | NS         | Control V Dasatinib  | NS         | Control V Dasatinib  | NS              | Control V Dasatinib  | NS              | Control V Dasatinib  | NS              |
|                      | Control V Crizotinib | 0.001      | Control V Crizotinib | 0.001      | Control V Crizotinib | 0.001           | Control V Crizotinib | 0.001           | Control V Crizotinib | 0.001           |
|                      | Control V Combo      | 0.001      | Control V Combo      | 0.001      | Control V Combo      | 0.001           | Control V Combo      | 0.001           | Control V Combo      | 0.001           |
|                      | Source of variation  |            |                      |            |                      | $P$ value       |                      |                 |                      |                 |
|                      | Drug                 |            |                      |            |                      | $\leq 0.0001$   |                      |                 |                      |                 |
|                      | Time                 |            |                      |            |                      | $\leq 0.0001$   |                      |                 |                      |                 |
|                      | Interaction          |            |                      |            |                      | $\leq 0.0001$   |                      |                 |                      |                 |

(Continued)

|                      |                      |              |                      |              |                      |                 |                      |                 |                      |                 |
|----------------------|----------------------|--------------|----------------------|--------------|----------------------|-----------------|----------------------|-----------------|----------------------|-----------------|
| T                    | 48 hours             |              | 72 hours             |              | 24 hour washout      |                 | 48 hour washout      |                 | 72 hour washout      |                 |
|                      | Treatment            | <i>P</i> (≤) | Treatment            | <i>P</i> (≤) | Treatment            | <i>P</i> (≤)    | Treatment            | <i>P</i> (≤)    | Treatment            | <i>P</i> (≤)    |
|                      | Control V Dasatinib  | NS           | Control V Dasatinib  | NS           | Control V Dasatinib  | NS              | Control V Dasatinib  | NS              | Control V Dasatinib  | NS              |
|                      | Control V Crizotinib | 0.001        | Control V Crizotinib | 0.001        | Control V Crizotinib | 0.001           | Control V Crizotinib | 0.001           | Control V Crizotinib | 0.001           |
|                      | Control V Combo      | NS           | Control V Combo      | NS           | Control V Combo      | NS              | Control V Combo      | 0.001           | Control V Combo      | 0.001           |
|                      | Source of variation  |              |                      |              |                      | <i>P</i> value  |                      |                 |                      |                 |
|                      | Drug                 |              |                      |              |                      | ≤0.0001         |                      |                 |                      |                 |
|                      | Time                 |              |                      |              |                      | ≤0.0001         |                      |                 |                      |                 |
|                      | Interaction          |              |                      |              |                      | ≤0.0001         |                      |                 |                      |                 |
|                      | 8X                   | 48 hours     |                      | 72 hours     |                      | 24 hour washout |                      | 48 hour washout |                      | 72 hour washout |
| Treatment            |                      | <i>P</i> (≤) | Treatment            | <i>P</i> (≤) | Treatment            | <i>P</i> (≤)    | Treatment            | <i>P</i> (≤)    | Treatment            | <i>P</i> (≤)    |
| Control V Dasatinib  |                      | NS           | Control V Dasatinib  | NS           | Control V Dasatinib  | NS              | Control V Dasatinib  | NS              | Control V Dasatinib  | NS              |
| Control V Crizotinib |                      | NS           | Control V Crizotinib | NS           | Control V Crizotinib | 0.001           | Control V Crizotinib | 0.001           | Control V Crizotinib | 0.001           |
| Control V Combo      |                      | NS           | Control V Combo      | NS           | Control V Combo      | 0.001           | Control V Combo      | 0.001           | Control V Combo      | 0.001           |
| Source of variation  |                      |              |                      |              | <i>P</i> value       |                 |                      |                 |                      |                 |
| Drug                 |                      |              |                      |              | ≤0.0001              |                 |                      |                 |                      |                 |
| Time                 |                      |              |                      |              | NS (0.56)            |                 |                      |                 |                      |                 |
| Interaction          |                      |              |                      |              | ≤0.001               |                 |                      |                 |                      |                 |

X denotes the quantity of DNA in the G1 phase of the cell cycle. 2X corresponds to the G2M phase while 4X and 8X to tetraploid and octoploid cells. S denotes DNA synthesis phase and T denotes transitional phase between the diploid, tetraploid and octoploid phases. Combo denotes combination and NS non-significant.

Supplementary Table S3: Statistical analysis of U373 cell cycle

|                      |                      |            |                      |            |                      |                 |                      |                 |                      |                 |
|----------------------|----------------------|------------|----------------------|------------|----------------------|-----------------|----------------------|-----------------|----------------------|-----------------|
| 1<br>X               | 48 hours             |            | 72 hours             |            | 24 hour washout      |                 | 48 hour washout      |                 | 72 hour washout      |                 |
|                      | Treatment            | $P (\leq)$ | Treatment            | $P (\leq)$ | Treatment            | $P (\leq)$      | Treatment            | $P (\leq)$      | Treatment            | $P (\leq)$      |
|                      | Control V Dasatinib  | NS         | Control V Dasatinib  | NS         | Control V Dasatinib  | NS              | Control V Dasatinib  | NS              | Control V Dasatinib  | NS              |
|                      | Control V Crizotinib | 0.001      | Control V Crizotinib | 0.001      | Control V Crizotinib | 0.001           | Control V Crizotinib | 0.001           | Control V Crizotinib | 0.001           |
|                      | Control V Combo      | 0.001      | Control V Combo      | 0.001      | Control V Combo      | 0.001           | Control V Combo      | 0.001           | Control V Combo      | 0.001           |
|                      | Source of variation  |            |                      |            |                      | $P$ value       |                      |                 |                      |                 |
|                      | Drug                 |            |                      |            |                      | $\leq 0.0001$   |                      |                 |                      |                 |
|                      | Time                 |            |                      |            |                      | $\leq 0.0001$   |                      |                 |                      |                 |
|                      | Interaction          |            |                      |            |                      | $\leq 0.0001$   |                      |                 |                      |                 |
|                      | S                    | 48 hours   |                      | 72 hours   |                      | 24 hour washout |                      | 48 hour washout |                      | 72 hour washout |
| Treatment            |                      | $P (\leq)$ | Treatment            | $P (\leq)$ | Treatment            | $P (\leq)$      | Treatment            | $P (\leq)$      | Treatment            | $P (\leq)$      |
| Control V Dasatinib  |                      | NS         | Control V Dasatinib  | NS         | Control V Dasatinib  | 0.05            | Control V Dasatinib  | NS              | Control V Dasatinib  | 0.001           |
| Control V Crizotinib |                      | 0.001      | Control V Crizotinib | 0.001      | Control V Crizotinib | 0.001           | Control V Crizotinib | NS              | Control V Crizotinib | NS              |
| Control V Combo      |                      | NS         | Control V Combo      | NS         | Control V Combo      | NS              | Control V Combo      | NS              | Control V Combo      | 0.01            |
| Source of variation  |                      |            |                      |            | $P$ value            |                 |                      |                 |                      |                 |
| Drug                 |                      |            |                      |            | $\leq 0.0001$        |                 |                      |                 |                      |                 |
| Time                 |                      |            |                      |            | $\leq 0.0001$        |                 |                      |                 |                      |                 |
| Interaction          |                      |            |                      |            | $\leq 0.0001$        |                 |                      |                 |                      |                 |
| 2<br>X               |                      | 48 hours   |                      | 72 hours   |                      | 24 hour washout |                      | 48 hour washout |                      | 72 hour washout |
|                      | Treatment            | $P (\leq)$ | Treatment            | $P (\leq)$ | Treatment            | $P (\leq)$      | Treatment            | $P (\leq)$      | Treatment            | $P (\leq)$      |
|                      | Control V Dasatinib  | NS         | Control V Dasatinib  | NS         | Control V Dasatinib  | NS              | Control V Dasatinib  | NS              | Control V Dasatinib  | NS              |
|                      | Control V Crizotinib | NS         | Control V Crizotinib | NS         | Control V Crizotinib | NS              | Control V Crizotinib | NS              | Control V Crizotinib | NS              |
|                      | Control V Combo      | 0.001      | Control V Combo      | 0.001      | Control V Combo      | 0.05            | Control V Combo      | NS              | Control V Combo      | NS              |
|                      | Source of variation  |            |                      |            |                      | $P$ value       |                      |                 |                      |                 |
|                      | Drug                 |            |                      |            |                      | $\leq 0.0001$   |                      |                 |                      |                 |
|                      | Time                 |            |                      |            |                      | $\leq 0.0001$   |                      |                 |                      |                 |
|                      | Interaction          |            |                      |            |                      | $\leq 0.0001$   |                      |                 |                      |                 |

(Continued)

|     |                      |            |                      |            |                      |               |                      |            |                      |            |  |
|-----|----------------------|------------|----------------------|------------|----------------------|---------------|----------------------|------------|----------------------|------------|--|
| T   | 48 hours             |            | 72 hours             |            | 24 hour washout      |               | 48 hour washout      |            | 72 hour washout      |            |  |
|     | Treatment            | $P (\leq)$ | Treatment            | $P (\leq)$ | Treatment            | $P (\leq)$    | Treatment            | $P (\leq)$ | Treatment            | $P (\leq)$ |  |
|     | Control V Dasatinib  | NS         | Control V Dasatinib  | NS         | Control V Dasatinib  | NS            | Control V Dasatinib  | NS         | Control V Dasatinib  | NS         |  |
|     | Control V Crizotinib | NS         | Control V Crizotinib | NS         | Control V Crizotinib | 0.05          | Control V Crizotinib | 0.001      | Control V Crizotinib | 0.05       |  |
|     | Control V Combo      | NS         | Control V Combo      | NS         | Control V Combo      | 0.05          | Control V Combo      | 0.001      | Control V Combo      | NS         |  |
|     | Source of variation  |            |                      |            |                      | $P$ value     |                      |            |                      |            |  |
|     | Drug                 |            |                      |            |                      | $\leq 0.0001$ |                      |            |                      |            |  |
|     | Time                 |            |                      |            |                      | $\leq 0.0001$ |                      |            |                      |            |  |
|     | Interaction          |            |                      |            |                      | $\leq 0.0001$ |                      |            |                      |            |  |
| 4 X | 48 hours             |            | 72 hours             |            | 24 hour washout      |               | 48 hour washout      |            | 72 hour washout      |            |  |
|     | Treatment            | $P (\leq)$ | Treatment            | $P (\leq)$ | Treatment            | $P (\leq)$    | Treatment            | $P (\leq)$ | Treatment            | $P (\leq)$ |  |
|     | Control V Dasatinib  | NS         | Control V Dasatinib  | NS         | Control V Dasatinib  | NS            | Control V Dasatinib  | NS         | Control V Dasatinib  | NS         |  |
|     | Control V Crizotinib | 0.001      | Control V Crizotinib | 0.001      | Control V Crizotinib | 0.001         | Control V Crizotinib | 0.001      | Control V Crizotinib | 0.001      |  |
|     | Control V Combo      | 0.01       | Control V Combo      | 0.01       | Control V Combo      | 0.001         | Control V Combo      | 0.001      | Control V Combo      | 0.001      |  |
|     | Source of variation  |            |                      |            |                      | $P$ value     |                      |            |                      |            |  |
|     | Drug                 |            |                      |            |                      | $\leq 0.0001$ |                      |            |                      |            |  |
|     | Time                 |            |                      |            |                      | $\leq 0.05$   |                      |            |                      |            |  |
|     | Interaction          |            |                      |            |                      | $\leq 0.0001$ |                      |            |                      |            |  |
| T   | 48 hours             |            | 72 hours             |            | 24 hour washout      |               | 48 hour washout      |            | 72 hour washout      |            |  |
|     | Treatment            | $P (\leq)$ | Treatment            | $P (\leq)$ | Treatment            | $P (\leq)$    | Treatment            | $P (\leq)$ | Treatment            | $P (\leq)$ |  |
|     | Control V Dasatinib  | NS         | Control V Dasatinib  | NS         | Control V Dasatinib  | NS            | Control V Dasatinib  | NS         | Control V Dasatinib  | NS         |  |
|     | Control V Crizotinib | 0.01       | Control V Crizotinib | 0.01       | Control V Crizotinib | 0.001         | Control V Crizotinib | 0.05       | Control V Crizotinib | 0.001      |  |
|     | Control V Combo      | NS         | Control V Combo      | NS         | Control V Combo      | NS            | Control V Combo      | NS         | Control V Combo      | 0.001      |  |
|     | Source of variation  |            |                      |            |                      | $P$ value     |                      |            |                      |            |  |
|     | Drug                 |            |                      |            |                      | $\leq 0.0001$ |                      |            |                      |            |  |
|     | Time                 |            |                      |            |                      | $\leq 0.005$  |                      |            |                      |            |  |
|     | Interaction          |            |                      |            |                      | $\leq 0.05$   |                      |            |                      |            |  |

(Continued)

| 8<br>X | 48 hours             |              | 72 hours             |              | 24 hour washout      |                | 48 hour washout      |              | 72 hour washout      |              |
|--------|----------------------|--------------|----------------------|--------------|----------------------|----------------|----------------------|--------------|----------------------|--------------|
|        | Treatment            | <i>P</i> (≤) | Treatment            | <i>P</i> (≤) | Treatment            | <i>P</i> (≤)   | Treatment            | <i>P</i> (≤) | Treatment            | <i>P</i> (≤) |
|        | Control V Dasatinib  | NS           | Control V Dasatinib  | NS           | Control V Dasatinib  | NS             | Control V Dasatinib  | NS           | Control V Dasatinib  | NS           |
|        | Control V Crizotinib | 0.001        | Control V Crizotinib | 0.001        | Control V Crizotinib | 0.001          | Control V Crizotinib | 0.01         | Control V Crizotinib | 0.001        |
|        | Control V Combo      | 0.01         | Control V Combo      | 0.01         | Control V Combo      | 0.001          | Control V Combo      | 0.001        | Control V Combo      | 0.001        |
|        | Source of variation  |              |                      |              |                      | <i>P</i> value |                      |              |                      |              |
|        | Drug                 |              |                      |              |                      | ≤0.0001        |                      |              |                      |              |
|        | Time                 |              |                      |              |                      | ≤0.0001        |                      |              |                      |              |
|        | Interaction          |              |                      |              |                      | ≤0.01          |                      |              |                      |              |

X denotes the quantity of DNA in the G1 phase of the cell cycle. 2X corresponds to the G2M phase while 4X and 8X to tetraploid and octoploid cells. S denotes DNA synthesis phase and T denotes transitional phase between the diploid, tetraploid and octoploid phases. Combo denotes combination and NS non-significant.

**Supplementary Table S4: Statistical analysis of A172 cell cycle**

| 1<br>X | 48 hours             |              | 72 hours             |              | 24 hour washout      |                | 48 hour washout      |              | 72 hour washout      |              |
|--------|----------------------|--------------|----------------------|--------------|----------------------|----------------|----------------------|--------------|----------------------|--------------|
|        | Treatment            | <i>P</i> (≤) | Treatment            | <i>P</i> (≤) | Treatment            | <i>P</i> (≤)   | Treatment            | <i>P</i> (≤) | Treatment            | <i>P</i> (≤) |
|        | Control V Dasatinib  | NS           | Control V Dasatinib  | NS           | Control V Dasatinib  | NS             | Control V Dasatinib  | NS           | Control V Dasatinib  | NS           |
|        | Control V Crizotinib | 0.001        | Control V Crizotinib | 0.001        | Control V Crizotinib | 0.001          | Control V Crizotinib | 0.001        | Control V Crizotinib | 0.001        |
|        | Control V Combo      | 0.001        | Control V Combo      | 0.001        | Control V Combo      | NS             | Control V Combo      | 0.001        | Control V Combo      | 0.001        |
|        | Source of variation  |              |                      |              |                      | <i>P</i> value |                      |              |                      |              |
|        | Drug                 |              |                      |              |                      | ≤0.0001        |                      |              |                      |              |
|        | Time                 |              |                      |              |                      | ≤0.01          |                      |              |                      |              |
|        | Interaction          |              |                      |              |                      | ≤0.0001        |                      |              |                      |              |

  

| S | 48 hours             |              | 72 hours             |              | 24 hour washout      |                | 48 hour washout      |              | 72 hour washout      |              |
|---|----------------------|--------------|----------------------|--------------|----------------------|----------------|----------------------|--------------|----------------------|--------------|
|   | Treatment            | <i>P</i> (≤) | Treatment            | <i>P</i> (≤) | Treatment            | <i>P</i> (≤)   | Treatment            | <i>P</i> (≤) | Treatment            | <i>P</i> (≤) |
|   | Control V Dasatinib  | 0.01         | Control V Dasatinib  | NS           | Control V Dasatinib  | NS             | Control V Dasatinib  | NS           | Control V Dasatinib  | NS           |
|   | Control V Crizotinib | NS           | Control V Crizotinib | 0.001        | Control V Crizotinib | NS             | Control V Crizotinib | NS           | Control V Crizotinib | NS           |
|   | Control V Combo      | NS           | Control V Combo      | 0.001        | Control V Combo      | 0.001          | Control V Combo      | 0.01         | Control V Combo      | NS           |
|   | Source of variation  |              |                      |              |                      | <i>P</i> value |                      |              |                      |              |
|   | Drug                 |              |                      |              |                      | ≤0.01          |                      |              |                      |              |
|   | Time                 |              |                      |              |                      | ≤0.0001        |                      |              |                      |              |
|   | Interaction          |              |                      |              |                      | ≤0.0001        |                      |              |                      |              |

(Continued)

|                      |                      |            |                      |            |                      |                 |                      |                 |                      |                 |
|----------------------|----------------------|------------|----------------------|------------|----------------------|-----------------|----------------------|-----------------|----------------------|-----------------|
| 2<br>X               | 48 hours             |            | 72 hours             |            | 24 hour washout      |                 | 48 hour washout      |                 | 72 hour washout      |                 |
|                      | Treatment            | $P (\leq)$ | Treatment            | $P (\leq)$ | Treatment            | $P (\leq)$      | Treatment            | $P (\leq)$      | Treatment            | $P (\leq)$      |
|                      | Control V Dasatinib  | NS         | Control V Dasatinib  | NS         | Control V Dasatinib  | NS              | Control V Dasatinib  | NS              | Control V Dasatinib  | NS              |
|                      | Control V Crizotinib | 0.001      | Control V Crizotinib | 0.001      | Control V Crizotinib | 0.001           | Control V Crizotinib | 0.001           | Control V Crizotinib | 0.001           |
|                      | Control V Combo      | 0.001      | Control V Combo      | 0.001      | Control V Combo      | NS              | Control V Combo      | 0.001           | Control V Combo      | 0.05            |
|                      | Source of variation  |            |                      |            |                      | $P$ value       |                      |                 |                      |                 |
|                      | Drug                 |            |                      |            |                      | $\leq 0.0001$   |                      |                 |                      |                 |
|                      | Time                 |            |                      |            |                      | $\leq 0.0001$   |                      |                 |                      |                 |
|                      | Interaction          |            |                      |            |                      | $\leq 0.0001$   |                      |                 |                      |                 |
|                      | T                    | 48 hours   |                      | 72 hours   |                      | 24 hour washout |                      | 48 hour washout |                      | 72 hour washout |
| Treatment            |                      | $P (\leq)$ | Treatment            | $P (\leq)$ | Treatment            | $P (\leq)$      | Treatment            | $P (\leq)$      | Treatment            | $P (\leq)$      |
| Control V Dasatinib  |                      | NS         | Control V Dasatinib  | NS         | Control V Dasatinib  | NS              | Control V Dasatinib  | NS              | Control V Dasatinib  | NS              |
| Control V Crizotinib |                      | NS         | Control V Crizotinib | NS         | Control V Crizotinib | NS              | Control V Crizotinib | NS              | Control V Crizotinib | NS              |
| Control V Combo      |                      | NS         | Control V Combo      | NS         | Control V Combo      | NS              | Control V Combo      | NS              | Control V Combo      | NS              |
| Source of variation  |                      |            |                      |            | $P$ value            |                 |                      |                 |                      |                 |
| Drug                 |                      |            |                      |            | $\leq 0.05$          |                 |                      |                 |                      |                 |
| Time                 |                      |            |                      |            | $\leq 0.0001$        |                 |                      |                 |                      |                 |
| Interaction          |                      |            |                      |            | NS (0.91)            |                 |                      |                 |                      |                 |
| 4<br>X               |                      | 48 hours   |                      | 72 hours   |                      | 24 hour washout |                      | 48 hour washout |                      | 72 hour washout |
|                      | Treatment            | $P (\leq)$ | Treatment            | $P (\leq)$ | Treatment            | $P (\leq)$      | Treatment            | $P (\leq)$      | Treatment            | $P (\leq)$      |
|                      | Control V Dasatinib  | NS         | Control V Dasatinib  | NS         | Control V Dasatinib  | NS              | Control V Dasatinib  | NS              | Control V Dasatinib  | NS              |
|                      | Control V Crizotinib | NS         | Control V Crizotinib | 0.001      | Control V Crizotinib | 0.01            | Control V Crizotinib | 0.001           | Control V Crizotinib | 0.001           |
|                      | Control V Combo      | NS         | Control V Combo      | NS         | Control V Combo      | NS              | Control V Combo      | 0.01            | Control V Combo      | 0.01            |
|                      | Source of variation  |            |                      |            |                      | $P$ value       |                      |                 |                      |                 |
|                      | Drug                 |            |                      |            |                      | $\leq 0.0001$   |                      |                 |                      |                 |
|                      | Time                 |            |                      |            |                      | NS (0.108)      |                      |                 |                      |                 |
|                      | Interaction          |            |                      |            |                      | $\leq 0.01$     |                      |                 |                      |                 |

(Continued)

|                      |                      |              |                      |              |                      |                 |                      |                 |                      |                 |  |
|----------------------|----------------------|--------------|----------------------|--------------|----------------------|-----------------|----------------------|-----------------|----------------------|-----------------|--|
| T                    | 48 hours             |              | 72 hours             |              | 24 hour washout      |                 | 48 hour washout      |                 | 72 hour washout      |                 |  |
|                      | Treatment            | <i>P</i> (≤) | Treatment            | <i>P</i> (≤) | Treatment            | <i>P</i> (≤)    | Treatment            | <i>P</i> (≤)    | Treatment            | <i>P</i> (≤)    |  |
|                      | Control V Dasatinib  | NS           | Control V Dasatinib  | NS           | Control V Dasatinib  | NS              | Control V Dasatinib  | NS              | Control V Dasatinib  | NS              |  |
|                      | Control V Crizotinib | 0.05         | Control V Crizotinib | NS           | Control V Crizotinib | NS              | Control V Crizotinib | NS              | Control V Crizotinib | NS              |  |
|                      | Control V Combo      | 0.05         | Control V Combo      | NS           | Control V Combo      | NS              | Control V Combo      | NS              | Control V Combo      | NS              |  |
|                      | Source of variation  |              |                      |              |                      | <i>P</i> value  |                      |                 |                      |                 |  |
|                      | Drug                 |              |                      |              |                      | NS (0.065)      |                      |                 |                      |                 |  |
|                      | Time                 |              |                      |              |                      | ≤0.0001         |                      |                 |                      |                 |  |
|                      | Interaction          |              |                      |              |                      | NS (0.36)       |                      |                 |                      |                 |  |
|                      | 8X                   | 48 hours     |                      | 72 hours     |                      | 24 hour washout |                      | 48 hour washout |                      | 72 hour washout |  |
| Treatment            |                      | <i>P</i> (≤) | Treatment            | <i>P</i> (≤) | Treatment            | <i>P</i> (≤)    | Treatment            | <i>P</i> (≤)    | Treatment            | <i>P</i> (≤)    |  |
| Control V Dasatinib  |                      | NS           | Control V Dasatinib  | NS           | Control V Dasatinib  | NS              | Control V Dasatinib  | NS              | Control V Dasatinib  | NS              |  |
| Control V Crizotinib |                      | NS           | Control V Crizotinib | NS           | Control V Crizotinib | NS              | Control V Crizotinib | NS              | Control V Crizotinib | NS              |  |
| Control V Combo      |                      | NS           | Control V Combo      | NS           | Control V Combo      | NS              | Control V Combo      | NS              | Control V Combo      | NS              |  |
| Source of variation  |                      |              |                      |              | <i>P</i> value       |                 |                      |                 |                      |                 |  |
| Drug                 |                      |              |                      |              | NS (0.22)            |                 |                      |                 |                      |                 |  |
| Time                 |                      |              |                      |              | ≤0.01                |                 |                      |                 |                      |                 |  |
| Interaction          |                      |              |                      |              | NS (0.64)            |                 |                      |                 |                      |                 |  |

X denotes the quantity of DNA in the G1 phase of the cell cycle. 2X corresponds to the G2M phase while 4X and 8X to tetraploid and octoploid cells. S denotes DNA synthesis phase and T denotes transitional phase between the diploid, tetraploid and octoploid phases. Combo denotes combination and NS non-significant.
